# Supplementary material
Source: HighWire-hosted journal article supplement (https://oem.bmj.com/content/81/4/201)
Supplement: inline-supplementary-material-1 [file inline-supplementary-material-1.pdf]

Supplementary table 1. Baseline characteristics included and excluded individuals

|                           | Included   | Excluded   | P- value |
|---------------------------|------------|------------|----------|
|                           | %          | %          |          |
| Total                     | 71.9       | 28.1       |          |
| Sex                       |            |            | <0.001   |
| Male                      | 53.0       | 45.5       |          |
| Female                    | 47.0       | 54.5       |          |
| Country of birth          |            |            | <0.001   |
| Sweden                    | 95.4       | 51.5       |          |
| Outside of Sweden         | 4.6        | 48.5       |          |
| Birth year                |            |            | <0.001   |
| 1973                      | 26.3       | 24.3       |          |
| 1974                      | 26.3       | 25.0       |          |
| 1975                      | 24.4       | 25.6       |          |
| 1976                      | 23.0       | 25.1       |          |
| Age at baseline (mean±SD) | 24.2 ± 3.5 | 24.8 ± 3.7 |          |
| Education                 |            |            | <0.001   |
| Primary                   | 7.8        | 10.0       |          |
| Secondary                 | 53.8       | 34.8       |          |
| University                | 38.4       | 32.7       |          |

|                                       |      |      |        |
|---------------------------------------|------|------|--------|
| Missing                               | 0    | 22.6 |        |
| Prior mental health problems          | 2.9  | 3.0  | 0.201  |
| Prior alcohol-related health problems | 0.3  | 0.5  | <0.001 |
| Parental education                    |      |      | <0.001 |
| Primary                               | 15.6 | 6.2  |        |
| Secondary                             | 50.1 | 21.3 |        |
| University                            | 34.4 | 21.6 |        |
| Missing                               | 0    | 51.0 |        |
| Parental SES                          |      |      | <0.001 |
| Non-manual                            | 53.8 | 31.4 |        |
| Manual                                | 35.2 | 16.0 |        |
| Self-employed/farmer                  | 4.2  | 1.9  |        |
| Not classified                        | 6.8  | 50.7 |        |

---

SES: socioeconomic status

Supplementary Table 2. Crude and adjusted HRs and 95% CI for the association between labour market position in young adulthood and later alcohol-related morbidity, excluding individuals with previous mental and alcohol-related health problems (n =10 176).

|         | PER<br>HR (95%CI) | Long-term unemployed<br>HR (95%CI) | SSER<br>HR (95%CI) | SER<br>HR (95%CI) | Other<br>HR (95%CI) |
|---------|-------------------|------------------------------------|--------------------|-------------------|---------------------|
| Crude   | 1.62 (1.49, 1.77) | 2.55 (2.35, 2.77)                  | 1.19 (1.11, 1.27)  | 1.00              | 2.48 (1.11, 1.27)   |
| Model 1 | 1.37 (1.30, 1.49) | 2.00 (1.84, 2.18)                  | 1.12 (1.04, 1.20)  | 1.00              | 1.78 (1.64, 1.94)   |
| Model 2 | 1.38 (1.27, 1.50) | 1.96 (1.80, 2.13)                  | 1.12 (1.05, 1.21)  | 1.00              | 1.76 (1.62, 1.92)   |

PER: Precarious employment relation, SSER: sub-standard employment relation, SER: standard employment relation, Other: self-employed, not registered as employed, or student

Model 1: Adjusted for sex, country of birth, year of birth, age at baseline, highest levels of own education.

Model 2: Additional adjustment for highest level of parents' educational attainment and socioeconomic status.

Supplementary Table 3. Crude and adjusted HRs and 95% CI for the association between labour market position in young adulthood and later alcohol-related morbidity, re-categorized individuals with any unemployment from the precarious employment group (n= 25 718) into the group ‘other’

|         | PER<br>HR (95%CI) | Long-term unemployed<br>HR (95%CI) | SSER<br>HR (95%CI) | SER<br>HR (95%CI) | Other<br>HR (95%CI) |
|---------|-------------------|------------------------------------|--------------------|-------------------|---------------------|
| Crude   | 1.42 (1.26, 1.61) | 2.71 (2.51, 2.92)                  | 1.24 (1.16, 1.32)  | 1.00              | 2.47 (2.32, 2.64)   |
| Model 1 | 1.29 (1.12, 1.45) | 2.10 (1.94, 2.27)                  | 1.17 (1.09, 1.25)  | 1.00              | 1.80 (1.68, 1.93)   |
| Model 2 | 1.23 (1.08, 1.39) | 2.00 (1.85, 2.16)                  | 1.15 (1.07, 1.23)  | 1.00              | 1.60 (1.49, 1.71)   |
| Model 3 | 1.25 (1.10, 1.42) | 1.95 (1.80, 2.11)                  | 1.15 (1.07, 1.23)  | 1.00              | 1.60 (1.49, 1.71)   |

PER: Precarious employment relation, SSER: sub-standard employment relation, SER: standard employment relation, Other: self-employed, not registered as employed, or student

Model 1: Adjusted for sex, country of birth, year of birth, age at baseline, highest levels of own education.

Model 2: Additional adjustment for prior mental health and alcohol-related health problems requiring inpatient care.

Model 3: Additional adjustment for highest level of parents' educational attainment and socioeconomic status.

Supplementary Table 4. Crude and adjusted HRs and 95% CI for the association between labour market establishment at a young age and later alcohol-related morbidity, excluding individuals with missing information on the year of exam (n =24 512).

|         | PER<br>HR (95%CI) | Long-term unemployed<br>HR (95%CI) | SSER<br>HR (95%CI) | SER<br>HR (95%CI) | Other<br>HR (95%CI) |
|---------|-------------------|------------------------------------|--------------------|-------------------|---------------------|
| Crude   | 1.42 (1.24, 1.62) | 2.65 (2.44, 2.88)                  | 1.28 (1.19, 1.37)  | 1.00              | 2.45 (2.28, 2.63)   |
| Model 1 | 1.27 (1.11, 1.45) | 2.11 (1.94, 2.29)                  | 1.19 (1.11, 1.28)  | 1.00              | 1.84 (1.71, 1.98)   |
| Model 2 | 1.22 (1.07, 1.40) | 1.99 (1.83, 2.16)                  | 1.18 (1.10, 1.26)  | 1.00              | 1.68 (1.56, 1.81)   |
| Model 3 | 1.24 (1.09, 1.42) | 1.94 (1.78, 2.11)                  | 1.18 (1.10, 1.27)  | 1.00              | 1.67 (1.55, 1.80)   |

PER: Precarious employment relation, SSER: sub-standard employment relation, SER: standard employment relation, Other: self-employed, not registered as employed, or student

Model 1: Adjusted for sex, country of birth, year of birth, age at baseline, highest levels of own education.

Model 2: Additional adjustment for prior mental health and alcohol-related health problems requiring inpatient care.

Model 3: Additional adjustment for highest level of parents' educational attainment and socioeconomic status.
